# Supplementary material
Source: HighWire-hosted journal article supplement (https://bmjopen.bmj.com/content/7/8/e017379)
Supplement: inline-supplementary-material-2 [file inline-supplementary-material-2.pdf]

## Free Informed Consent

**Title:**

**Institution:**

**Project manager:**

**Research assistant:**

**Head of unit:**

1. I declare to have read the above-described information and accept to voluntarily participate in the study "Effects of bodyweight and shoe cushioning on injury risk and running biomechanics: A randomised control trial" conducted by the SMRL.
2. I accept that my data shall be used and communicated to the commercial partner for strictly scientific purposes once it has been pseudonymised (coded).
3. I received a copy of the present signed informed consent document, as well as the general information intended for athlete participants. I received a clear description of the purpose and the nature of the study and I am aware of what is expected of me as a participant in this study. I have had enough time and the opportunity to ask questions about the study; all my questions have been met with a satisfactory answer.
4. I am free to retire from the study at any time without justification. By doing so I will not suffer any material or moral damage.
5. I agree that the results of this study can be subject to public talks or scientific publication.
6. I voluntarily consent to participate in this study and I fully understand what kind of data will be gathered during the study.
7. I preserve/abide the rights of access, deletion or modification of my personal data. Any personal information will be kept confidential and protected in agreement with the modified personal data protection act of August 2nd 2002. I can exercise that right via the project manager.

**The responding signatory freely consents to participate in the above mentioned study**

**Name and First Name of the respondent:** .....

**Signature of the respondent:** .....

**Name and signature of the project manager:** .....

**Place and date:** .....
